# Supplementary material for: Oriented Interpenetrating Capillary Network with Surface Engineering by Porous ZnO from Wood for Membrane Emulsification
Source: MDPI journal article supplement (doi:10.3390/ma17092113), 2024-04-30
Supplement: s1 [file s1]

# Oriented Interpenetrating Capillary Network with Surface Engineering by Porous ZnO from Wood for Membrane Emulsification

Yaodong Chen <sup>1</sup>, Xiaolin Liu <sup>2</sup>, Gonggang Liu <sup>1,\*</sup>, Shanshan Chang <sup>1</sup> and Jinbo Hu <sup>1,\*</sup>

<sup>1</sup> Hunan Province Key Laboratory of Materials Surface & Interface Science and Technology, College of Materials Science and Engineering, Central South University of Forestry and Technology, Changsha 410004, China; cyd222610@163.com (Y.C.); changelxy@hotmail.com (S.C.)

<sup>2</sup> Hunan Lintec Co., Ltd., Changsha 410600, China; liuxiaolin@lintec-x.com

\* Correspondence: liugonggang@csuft.edu.cn (G.L.); jinbo.hu@csuft.edu.cn (J.H.)

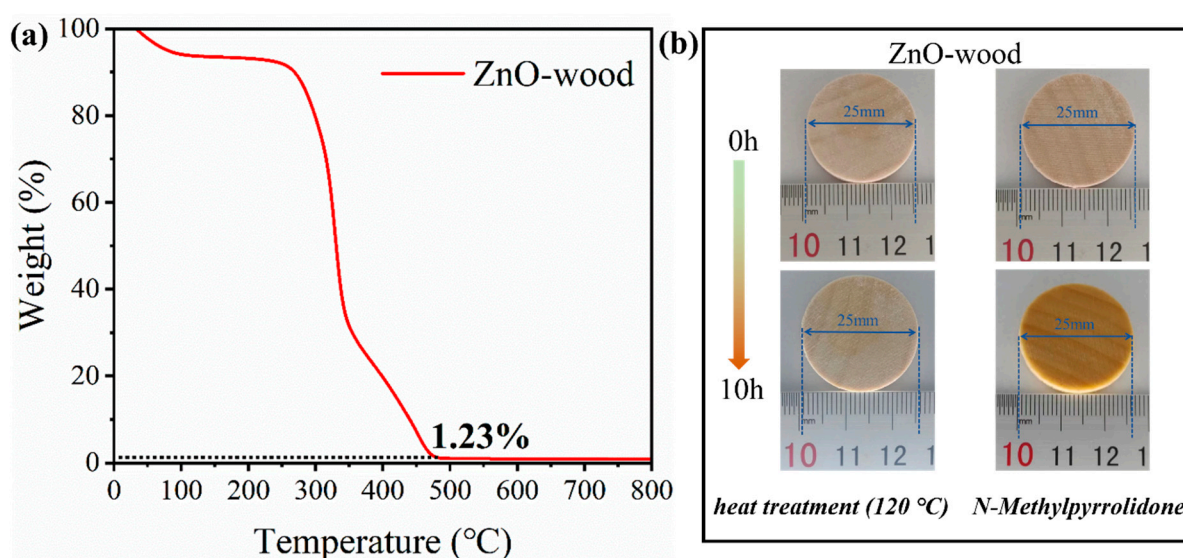

**Figure S1.** (a) The thermogravimetric degradation of ZnO-wood in an oxygen atmosphere; (b) Digital photographs of ZnO-wood before and after heat treatment and N-Methylpyrrolidone soaking, respectively.

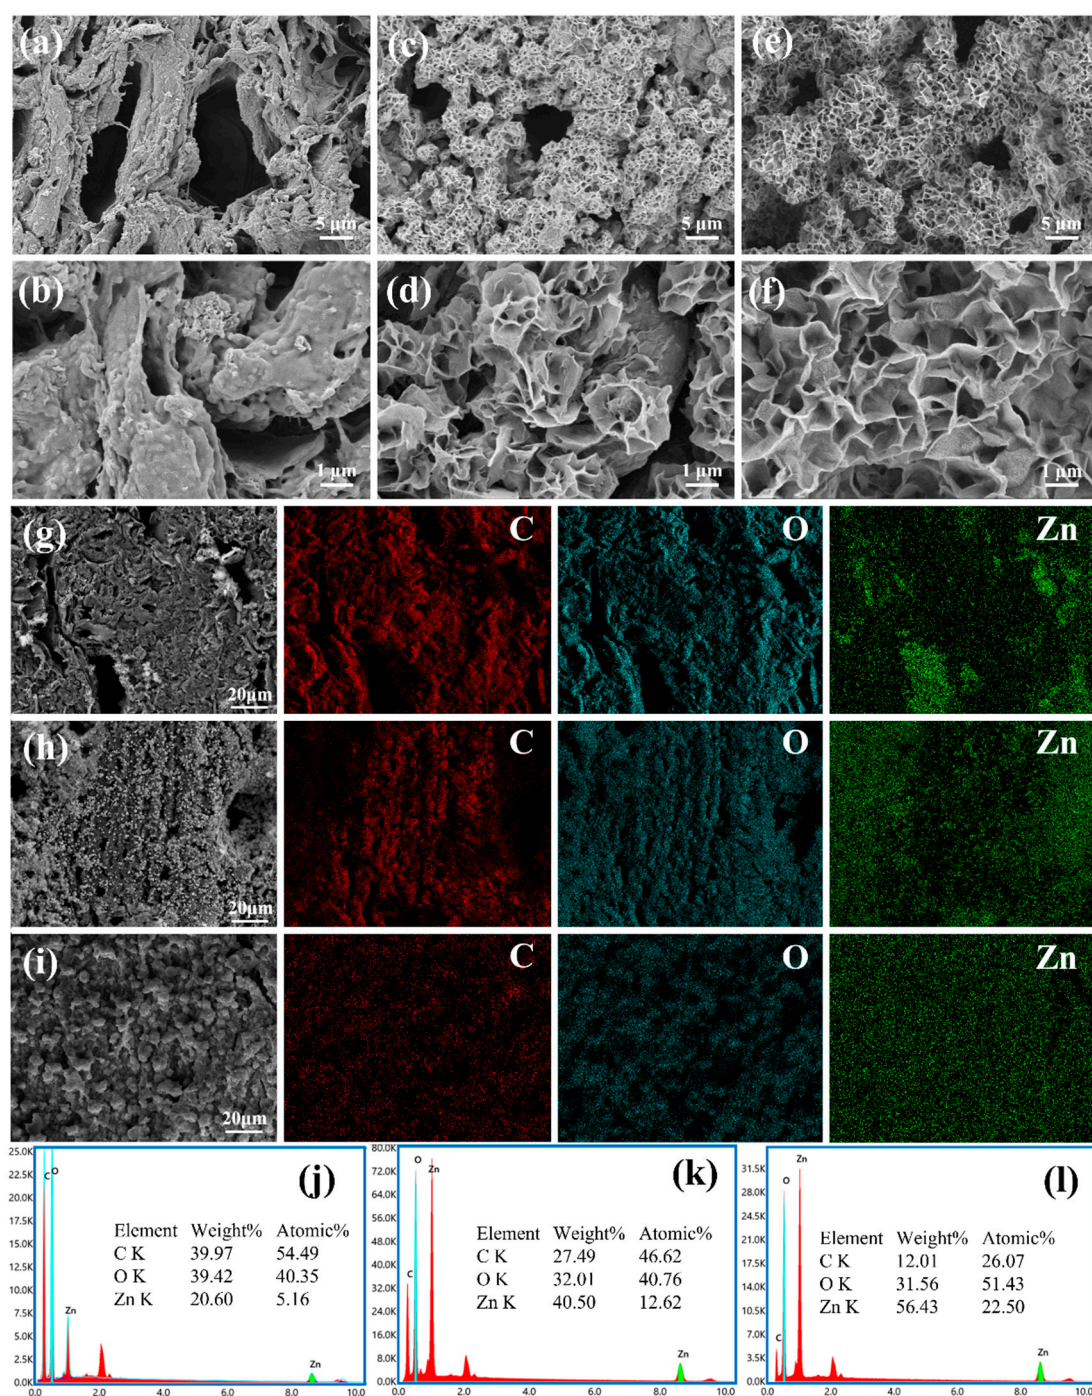

**Figure S2.** SEM images of ZnO-wood with various hydrothermal time: (a, b) 2h; (c, d) 6h; (e, f) 10h; the element mappings and EDS spectrum images of ZnO-wood with (g, j) 2h, (h, k) 6h and (i, l) 10h hydrothermal time.



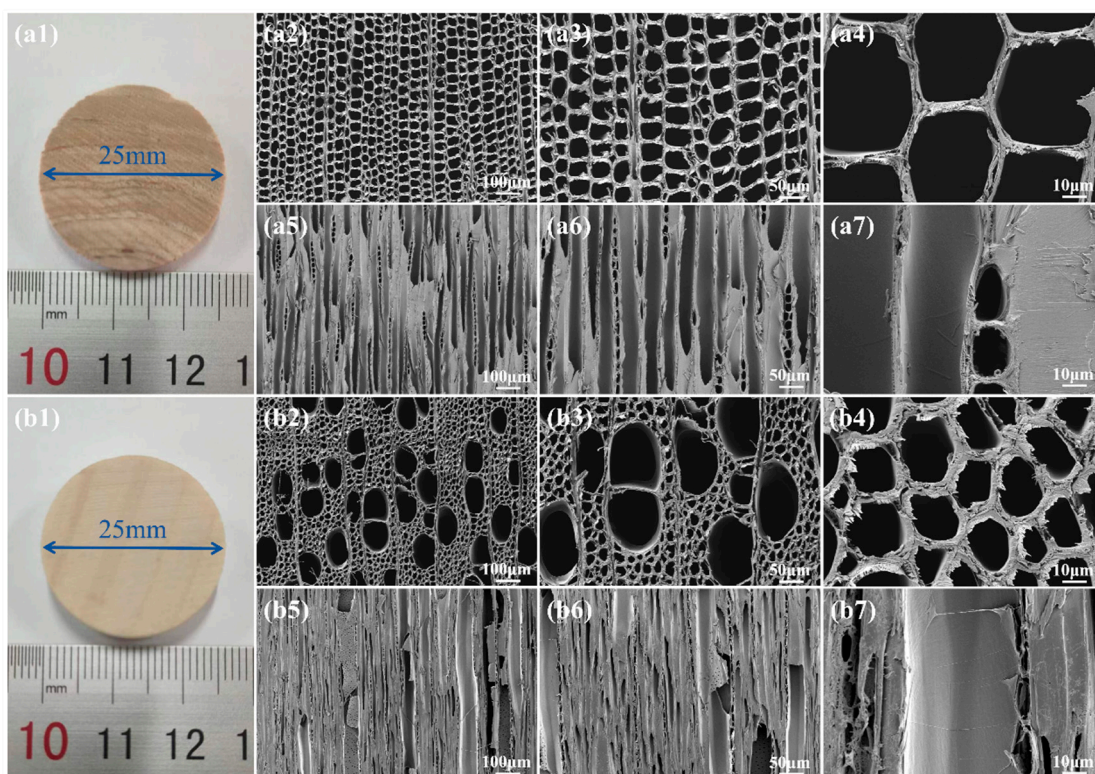

Figure S3. Digital photographs and SEM images of (a1-a7) fir wood and (b1-b7) poplar.

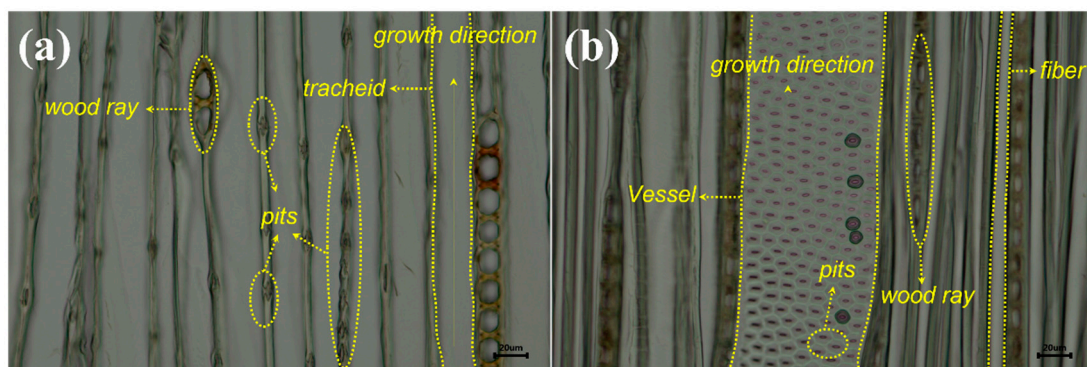

Figure S4. The light microscope images of (a) fir and (b) poplar wood along the growth direction

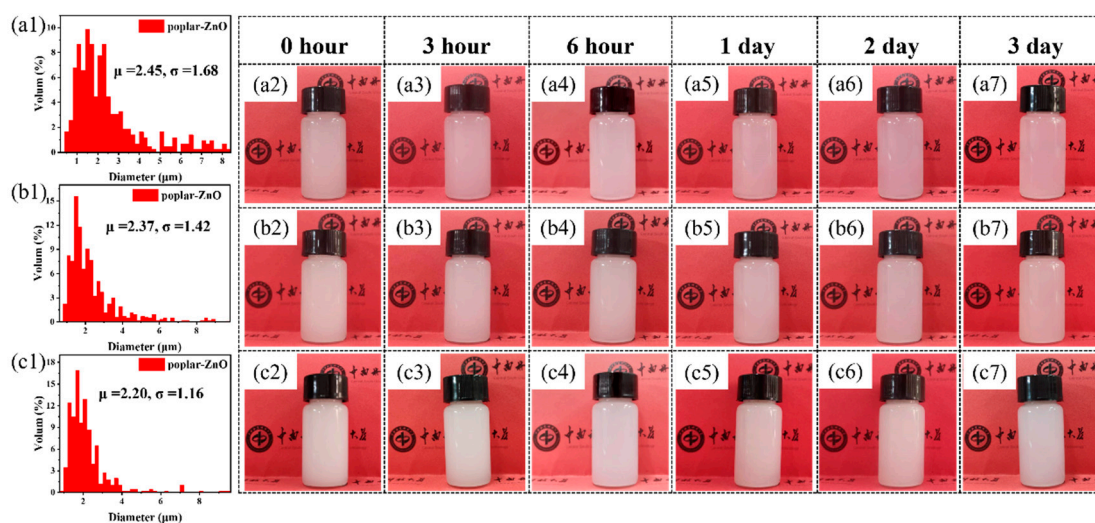

**Figure S5.** The droplet size distributions and digital images of oil in water emulsions from ZnO-wood membrane prepared by different hydrothermal time: (a1-a7) 2h; (b1-b7) 6h; (c1-c7) 10h; (1) digital photograph; (2) optical microscope image; (3) droplet size distribution.

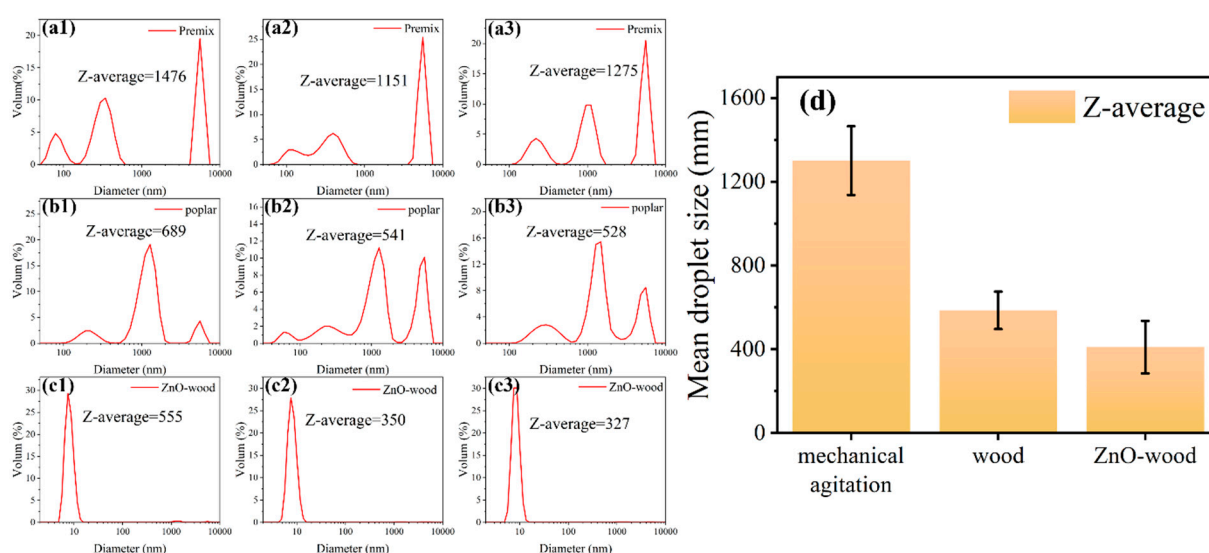

**Figure S6.** The droplet sizes and their distributions characterized by the Malvern Zetasizer: (a1-a3) three parallel experiments obtained from mechanical agitation; (b1-b3) three parallel experiments obtained from poplar wood membrane; (c1-c3) three parallel experiments obtained from ZnO-wood membrane; (d) their mean drop size analysis.

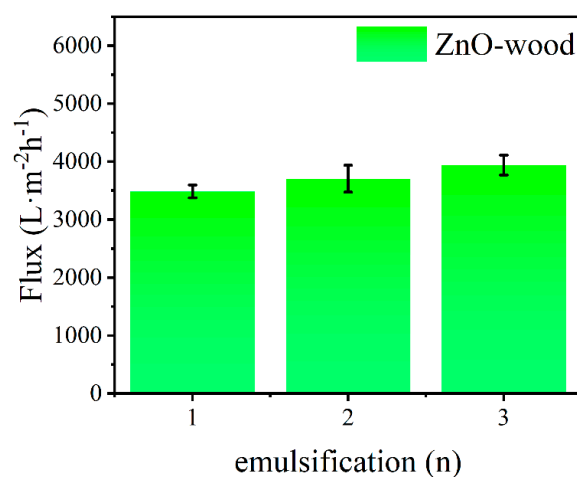

**Figure S7.** The membrane emulsification fluxes during three consecutive membrane emulsification cycles.
